# Supplementary material
Source: Research Square preprint supplement (doi:10.21203/rs.3.rs-9318234/v1)
Supplement: Supplementary file 1 [file 670542feee1442ba48def349.xlsx]

## Sheet: 1. hız
NUMUNE ADI	MESAFE (km)	AĞIRLIK (g)	Hız	Mesafe	Ağırlık kaybı (oransal)	Ağırlık kaybı (%)	Ağırlık Kaybı (g)						Ağırlık kaybı (%)								Ağırlık kaybı (g)
S1-1	0	487.77	0.87	0	0	0	0				Hız	Mesafe	1. Tek	2. Tek	3. Tek	Ort			Hız	Mesafe	1. Tek	2. Tek	3. Tek	Ort
	5	487.74	0.87	5	6.15044e-05	0.00615044	0.03			S1	0.87	0	0	0	0	0		S1	0.87	0	0	0	0	0
	10	487.72	0.87	10	0.000102507	0.0102507	0.05			S1	0.87	5	0.00615044	0.00410846	0.0041137	0.00479087		S1	0.87	5	0.03	0.02	0.02	0.0233333
	15	487.7	0.87	15	0.00014351	0.014351	0.07			S1	0.87	10	0.0102507	0.00821693	0.00822741	0.00889836		S1	0.87	10	0.05	0.04	0.04	0.0433333
	20	487.67	0.87	20	0.000205015	0.0205015	0.1			S1	0.87	15	0.014351	0.0123254	0.0123411	0.0130058		S1	0.87	15	0.07	0.06	0.06	0.0633333
	25	487.64	0.87	25	0.000266519	0.0266519	0.13			S1	0.87	20	0.0205015	0.0184881	0.0185117	0.0191671		S1	0.87	20	0.1	0.09	0.09	0.0933333
	30	487.6	0.87	30	0.000348525	0.0348525	0.17			S1	0.87	25	0.0266519	0.0246508	0.0267391	0.0260139		S1	0.87	25	0.13	0.12	0.13	0.126667
	35	487.56	0.87	35	0.000430531	0.0430531	0.21			S1	0.87	30	0.0348525	0.0328677	0.0370233	0.0349145		S1	0.87	30	0.17	0.16	0.18	0.17
	40	487.51	0.87	40	0.000533038	0.0533038	0.26			S1	0.87	35	0.0430531	0.0410846	0.0493644	0.0445007		S1	0.87	35	0.21	0.2	0.24	0.216667
	45	487.44	0.87	45	0.000676548	0.0676548	0.33			S1	0.87	40	0.0533038	0.0513558	0.0617055	0.055455		S1	0.87	40	0.26	0.25	0.3	0.27
	50	487.37	0.87	50	0.000820059	0.0820059	0.4			S1	0.87	45	0.0676548	0.0657354	0.0781604	0.0705169		S1	0.87	45	0.33	0.32	0.38	0.343333
S1-2	0	486.8	0.87	0	0	0	0			S1	0.87	50	0.0820059	0.080115	0.096672	0.0862643		S1	0.87	50	0.4	0.39	0.47	0.42
	5	486.78	0.87	5	4.10846e-05	0.00410846	0.02			S2	0.87	0	0	0	0	0		S2	0.87	0	0	0	0	0
	10	486.76	0.87	10	8.21693e-05	0.00821693	0.04			S2	0.87	5	0.00205065	0.00203393	0.002052	0.00204552		S2	0.87	5	0.01	0.01	0.01	0.01
	15	486.74	0.87	15	0.000123254	0.0123254	0.06			S2	0.87	10	0.00615195	0.00610178	0.00615599	0.00613657		S2	0.87	10	0.03	0.03	0.03	0.03
	20	486.71	0.87	20	0.000184881	0.0184881	0.09			S2	0.87	15	0.0102533	0.0101696	0.01026	0.0102276		S2	0.87	15	0.05	0.05	0.05	0.05
	25	486.68	0.87	25	0.000246508	0.0246508	0.12			S2	0.87	20	0.0164052	0.0162714	0.016416	0.0163642		S2	0.87	20	0.08	0.08	0.08	0.08
	30	486.64	0.87	30	0.000328677	0.0328677	0.16			S2	0.87	25	0.0225572	0.0223732	0.024624	0.0231848		S2	0.87	25	0.11	0.11	0.12	0.113333
	35	486.6	0.87	35	0.000410846	0.0410846	0.2			S2	0.87	30	0.0287091	0.0305089	0.034884	0.0313673		S2	0.87	30	0.14	0.15	0.17	0.153333
	40	486.55	0.87	40	0.000513558	0.0513558	0.25			S2	0.87	35	0.0369117	0.0386446	0.0471959	0.0409174		S2	0.87	35	0.18	0.19	0.23	0.2
	45	486.48	0.87	45	0.000657354	0.0657354	0.32			S2	0.87	40	0.047165	0.0488142	0.0595079	0.051829		S2	0.87	40	0.23	0.24	0.29	0.253333
	50	486.41	0.87	50	0.00080115	0.080115	0.39			S2	0.87	45	0.0615195	0.0630517	0.0759239	0.0668317		S2	0.87	45	0.3	0.31	0.37	0.326667
S1-3	0	486.18	0.87	0	0	0	0			S2	0.87	50	0.0758741	0.0772892	0.0943919	0.0825184		S2	0.87	50	0.37	0.38	0.46	0.403333
	5	486.16	0.87	5	4.1137e-05	0.0041137	0.02			A1	0.87	0	0	0	0	0		A1	0.87	0	0	0	0	0
	10	486.14	0.87	10	8.22741e-05	0.00822741	0.04			A1	0.87	5	0	0	0	0		A1	0.87	5	0	0	0	0
	15	486.12	0.87	15	0.000123411	0.0123411	0.06			A1	0.87	10	0	0	0	0		A1	0.87	10	0	0	0	0
	20	486.09	0.87	20	0.000185117	0.0185117	0.09			A1	0.87	15	0	0	0	0		A1	0.87	15	0	0	0	0
	25	486.05	0.87	25	0.000267391	0.0267391	0.13			A1	0.87	20	0	0	0	0		A1	0.87	20	0	0	0	0
	30	486	0.87	30	0.000370233	0.0370233	0.18			A1	0.87	25	0	0	0	0		A1	0.87	25	0	0	0	0
	35	485.94	0.87	35	0.000493644	0.0493644	0.24			A1	0.87	30	0	0	0	0		A1	0.87	30	0	0	0	0
	40	485.88	0.87	40	0.000617055	0.0617055	0.3			A1	0.87	35	0	0	0	0		A1	0.87	35	0	0	0	0
	45	485.8	0.87	45	0.000781604	0.0781604	0.38			A1	0.87	40	0.00212238	0	0	0.000707459		A1	0.87	40	0.01	0	0	0.00333333
	50	485.71	0.87	50	0.00096672	0.096672	0.47			A1	0.87	45	0.00212238	0.002119	0	0.00141379		A1	0.87	45	0.01	0.01	0	0.00666667
S2-1	0	487.65	0.87	0	0	0	0			A1	0.87	50	0.00212238	0.002119	0	0.00141379		A1	0.87	50	0.01	0.01	0	0.00666667
	5	487.64	0.87	5	2.05065e-05	0.00205065	0.01			A2	0.87	0	0	0	0	0		A2	0.87	0	0	0	0	0
	10	487.62	0.87	10	6.15195e-05	0.00615195	0.03			A2	0.87	5	0	0	0	0		A2	0.87	5	0	0	0	0
	15	487.6	0.87	15	0.000102533	0.0102533	0.05			A2	0.87	10	0	0	0	0		A2	0.87	10	0	0	0	0
	20	487.57	0.87	20	0.000164052	0.0164052	0.08			A2	0.87	15	0	0	0	0		A2	0.87	15	0	0	0	0
	25	487.54	0.87	25	0.000225572	0.0225572	0.11			A2	0.87	20	0	0	0	0		A2	0.87	20	0	0	0	0
	30	487.51	0.87	30	0.000287091	0.0287091	0.14			A2	0.87	25	0	0	0	0		A2	0.87	25	0	0	0	0
	35	487.47	0.87	35	0.000369117	0.0369117	0.18			A2	0.87	30	0	0	0	0		A2	0.87	30	0	0	0	0
	40	487.42	0.87	40	0.00047165	0.047165	0.23			A2	0.87	35	0	0	0	0		A2	0.87	35	0	0	0	0
	45	487.35	0.87	45	0.000615195	0.0615195	0.3			A2	0.87	40	0.0021208	0	0	0.000706934		A2	0.87	40	0.01	0	0	0.00333333
	50	487.28	0.87	50	0.000758741	0.0758741	0.37			A2	0.87	45	0.0042416	0.00212368	0	0.00212176		A2	0.87	45	0.02	0.01	0	0.01
S2-2	0	491.66	0.87	0	0	0	0			A2	0.87	50	0.0063624	0.00424737	0	0.00353659		A2	0.87	50	0.03	0.02	0	0.0166667
	5	491.65	0.87	5	2.03393e-05	0.00203393	0.01			B1	0.87	0	0	0	0	0		B1	0.87	0	0	0	0	0
	10	491.63	0.87	10	6.10178e-05	0.00610178	0.03			B1	0.87	5	0	0	0	0		B1	0.87	5	0	0	0	0
	15	491.61	0.87	15	0.000101696	0.0101696	0.05			B1	0.87	10	0	0	0	0		B1	0.87	10	0	0	0	0
	20	491.58	0.87	20	0.000162714	0.0162714	0.08			B1	0.87	15	0	0	0	0		B1	0.87	15	0	0	0	0
	25	491.55	0.87	25	0.000223732	0.0223732	0.11			B1	0.87	20	0	0	0	0		B1	0.87	20	0	0	0	0
	30	491.51	0.87	30	0.000305089	0.0305089	0.15			B1	0.87	25	0	0	0	0		B1	0.87	25	0	0	0	0
	35	491.47	0.87	35	0.000386446	0.0386446	0.19			B1	0.87	30	0	0	0.00213365	0.000711217		B1	0.87	30	0	0	0.01	0.00333333
	40	491.42	0.87	40	0.000488142	0.0488142	0.24			B1	0.87	35	0	0	0.00213365	0.000711217		B1	0.87	35	0	0	0.01	0.00333333
	45	491.35	0.87	45	0.000630517	0.0630517	0.31			B1	0.87	40	0	0	0.00213365	0.000711217		B1	0.87	40	0	0	0.01	0.00333333
	50	491.28	0.87	50	0.000772892	0.0772892	0.38			B1	0.87	45	0	0	0.00213365	0.000711217		B1	0.87	45	0	0	0.01	0.00333333
S2-3	0	487.33	0.87	0	0	0	0			B1	0.87	50	0	0.00211981	0.00213365	0.00141782		B1	0.87	50	0	0.01	0.01	0.00666667
	5	487.32	0.87	5	2.052e-05	0.002052	0.01			B2	0.87	0	0	0	0	0		B2	0.87	0	0	0	0	0
	10	487.3	0.87	10	6.15599e-05	0.00615599	0.03			B2	0.87	5	0	0	0	0		B2	0.87	5	0	0	0	0
	15	487.28	0.87	15	0.0001026	0.01026	0.05			B2	0.87	10	0	0	0	0		B2	0.87	10	0	0	0	0
	20	487.25	0.87	20	0.00016416	0.016416	0.08			B2	0.87	15	0	0	0	0		B2	0.87	15	0	0	0	0
	25	487.21	0.87	25	0.00024624	0.024624	0.12			B2	0.87	20	0	0	0	0		B2	0.87	20	0	0	0	0
	30	487.16	0.87	30	0.00034884	0.034884	0.17			B2	0.87	25	0	0	0	0		B2	0.87	25	0	0	0	0
	35	487.1	0.87	35	0.000471959	0.0471959	0.23			B2	0.87	30	0	0	0	0		B2	0.87	30	0	0	0	0
	40	487.04	0.87	40	0.000595079	0.0595079	0.29			B2	0.87	35	0	0	0	0		B2	0.87	35	0	0	0	0
	45	486.96	0.87	45	0.000759239	0.0759239	0.37			B2	0.87	40	0	0	0	0		B2	0.87	40	0	0	0	0
	50	486.87	0.87	50	0.000943919	0.0943919	0.46			B2	0.87	45	0	0.00212301	0	0.000707669		B2	0.87	45	0	0.01	0	0.00333333
A1-1	0	471.17	0.87	0	0	0	0			B2	0.87	50	0	0.00424601	0	0.00141534		B2	0.87	50	0	0.02	0	0.00666667
	5	471.17	0.87	5	0	0	0			C1	0.87	0	0	0	0	0		C1	0.87	0	0	0	0	0
	10	471.17	0.87	10	0	0	0			C1	0.87	5	0	0	0	0		C1	0.87	5	0	0	0	0
	15	471.17	0.87	15	0	0	0			C1	0.87	10	0	0	0	0		C1	0.87	10	0	0	0	0
	20	471.17	0.87	20	0	0	0			C1	0.87	15	0	0	0	0		C1	0.87	15	0	0	0	0
	25	471.17	0.87	25	0	0	0			C1	0.87	20	0	0.00380048	0	0.00126683		C1	0.87	20	0	0.02	0	0.00666667
	30	471.17	0.87	30	0	0	0			C1	0.87	25	0	0.00380048	0	0.00126683		C1	0.87	25	0	0.02	0	0.00666667
	35	471.17	0.87	35	0	0	0			C1	0.87	30	0	0.00570071	0	0.00190024		C1	0.87	30	0	0.03	0	0.01
	40	471.16	0.87	40	2.12238e-05	0.00212238	0.01			C1	0.87	35	0	0.00950119	0	0.00316706		C1	0.87	35	0	0.05	0	0.0166667
	45	471.16	0.87	45	2.12238e-05	0.00212238	0.01			C1	0.87	40	0	0.0114014	0	0.00380048		C1	0.87	40	0	0.06	0	0.02
	50	471.16	0.87	50	2.12238e-05	0.00212238	0.01			C1	0.87	45	0	0.0133017	0.00195817	0.00508661		C1	0.87	45	0	0.07	0.01	0.0266667
A1-2	0	471.92	0.87	0	0	0	0			C1	0.87	50	0	0.0171021	0.00391635	0.00700616		C1	0.87	50	0	0.09	0.02	0.0366667
	5	471.92	0.87	5	0	0	0			C2	0.87	0	0	0	0	0		C2	0.87	0	0	0	0	0
	10	471.92	0.87	10	0	0	0			C2	0.87	5	0	0	0	0		C2	0.87	5	0	0	0	0
	15	471.92	0.87	15	0	0	0			C2	0.87	10	0	0	0	0		C2	0.87	10	0	0	0	0
	20	471.92	0.87	20	0	0	0			C2	0.87	15	0	0	0	0		C2	0.87	15	0	0	0	0
	25	471.92	0.87	25	0	0	0			C2	0.87	20	0	0.00394019	0	0.0013134		C2	0.87	20	0	0.02	0	0.00666667
	30	471.92	0.87	30	0	0	0			C2	0.87	25	0	0.00788038	0	0.00262679		C2	0.87	25	0	0.04	0	0.0133333
	35	471.92	0.87	35	0	0	0			C2	0.87	30	0	0.0118206	0	0.00394019		C2	0.87	30	0	0.06	0	0.02
	40	471.92	0.87	40	0	0	0			C2	0.87	35	0	0.0157608	0	0.00525358		C2	0.87	35	0	0.08	0	0.0266667
	45	471.91	0.87	45	2.119e-05	0.002119	0.01			C2	0.87	40	0	0.0197009	0	0.00656698		C2	0.87	40	0	0.1	0	0.0333333
	50	471.91	0.87	50	2.119e-05	0.002119	0.01			C2	0.87	45	0	0.0236411	0.0019442	0.00852844		C2	0.87	45	0	0.12	0.01	0.0433333
A1-3	0	471.29	0.87	0	0	0	0			C2	0.87	50	0.00194894	0.0275813	0.0038884	0.0111396		C2	0.87	50	0.01	0.14	0.02	0.0566667
	5	471.29	0.87	5	0	0	0			D1	0.87	0	0	0	0	0		D1	0.87	0	0	0	0	0
	10	471.29	0.87	10	0	0	0			D1	0.87	5	0	0	0	0		D1	0.87	5	0	0	0	0
	15	471.29	0.87	15	0	0	0			D1	0.87	10	0	0	0	0		D1	0.87	10	0	0	0	0
	20	471.29	0.87	20	0	0	0			D1	0.87	15	0	0	0	0		D1	0.87	15	0	0	0	0
	25	471.29	0.87	25	0	0	0			D1	0.87	20	0	0	0	0		D1	0.87	20	0	0	0	0
	30	471.29	0.87	30	0	0	0			D1	0.87	25	0	0	0	0		D1	0.87	25	0	0	0	0
	35	471.29	0.87	35	0	0	0			D1	0.87	30	0	0	0	0		D1	0.87	30	0	0	0	0
	40	471.29	0.87	40	0	0	0			D1	0.87	35	0	0	0	0		D1	0.87	35	0	0	0	0
	45	471.29	0.87	45	0	0	0			D1	0.87	40	0	0	0	0		D1	0.87	40	0	0	0	0
	50	471.29	0.87	50	0	0	0			D1	0.87	45	0	0	0	0		D1	0.87	45	0	0	0	0
A2-1	0	471.52	0.87	0	0	0	0			D1	0.87	50	0	0	0	0		D1	0.87	50	0	0	0	0
	5	471.52	0.87	5	0	0	0			D2	0.87	0	0	0	0	0		D2	0.87	0	0	0	0	0
	10	471.52	0.87	10	0	0	0			D2	0.87	5	0	0	0	0		D2	0.87	5	0	0	0	0
	15	471.52	0.87	15	0	0	0			D2	0.87	10	0	0	0	0		D2	0.87	10	0	0	0	0
	20	471.52	0.87	20	0	0	0			D2	0.87	15	0	0	0	0		D2	0.87	15	0	0	0	0
	25	471.52	0.87	25	0	0	0			D2	0.87	20	0	0	0	0		D2	0.87	20	0	0	0	0
	30	471.52	0.87	30	0	0	0			D2	0.87	25	0	0	0	0		D2	0.87	25	0	0	0	0
	35	471.52	0.87	35	0	0	0			D2	0.87	30	0	0	0	0		D2	0.87	30	0	0	0	0
	40	471.51	0.87	40	2.1208e-05	0.0021208	0.01			D2	0.87	35	0	0	0	0		D2	0.87	35	0	0	0	0
	45	471.5	0.87	45	4.2416e-05	0.0042416	0.02			D2	0.87	40	0	0	0	0		D2	0.87	40	0	0	0	0
	50	471.49	0.87	50	6.3624e-05	0.0063624	0.03			D2	0.87	45	0	0	0	0		D2	0.87	45	0	0	0	0
A2-2	0	470.88	0.87	0	0	0	0			D2	0.87	50	0	0	0	0		D2	0.87	50	0	0	0	0
	5	470.88	0.87	5	0	0	0
	10	470.88	0.87	10	0	0	0
	15	470.88	0.87	15	0	0	0
	20	470.88	0.87	20	0	0	0
	25	470.88	0.87	25	0	0	0
	30	470.88	0.87	30	0	0	0
	35	470.88	0.87	35	0	0	0
	40	470.88	0.87	40	0	0	0
	45	470.87	0.87	45	2.12368e-05	0.00212368	0.01
	50	470.86	0.87	50	4.24737e-05	0.00424737	0.02
A2-3	0	471.51	0.87	0	0	0	0
	5	471.51	0.87	5	0	0	0
	10	471.51	0.87	10	0	0	0
	15	471.51	0.87	15	0	0	0
	20	471.51	0.87	20	0	0	0
	25	471.51	0.87	25	0	0	0
	30	471.51	0.87	30	0	0	0
	35	471.51	0.87	35	0	0	0
	40	471.51	0.87	40	0	0	0
	45	471.51	0.87	45	0	0	0
	50	471.51	0.87	50	0	0	0
B1-1	0	471.68	0.87	0	0	0	0
	5	471.68	0.87	5	0	0	0
	10	471.68	0.87	10	0	0	0
	15	471.68	0.87	15	0	0	0
	20	471.68	0.87	20	0	0	0
	25	471.68	0.87	25	0	0	0
	30	471.68	0.87	30	0	0	0
	35	471.68	0.87	35	0	0	0
	40	471.68	0.87	40	0	0	0
	45	471.68	0.87	45	0	0	0
	50	471.68	0.87	50	0	0	0
B1-2	0	471.74	0.87	0	0	0	0
	5	471.74	0.87	5	0	0	0
	10	471.74	0.87	10	0	0	0
	15	471.74	0.87	15	0	0	0
	20	471.74	0.87	20	0	0	0
	25	471.74	0.87	25	0	0	0
	30	471.74	0.87	30	0	0	0
	35	471.74	0.87	35	0	0	0
	40	471.74	0.87	40	0	0	0
	45	471.74	0.87	45	0	0	0
	50	471.73	0.87	50	2.11981e-05	0.00211981	0.01
B1-3	0	468.68	0.87	0	0	0	0
	5	468.68	0.87	5	0	0	0
	10	468.68	0.87	10	0	0	0
	15	468.68	0.87	15	0	0	0
	20	468.68	0.87	20	0	0	0
	25	468.68	0.87	25	0	0	0
	30	468.67	0.87	30	2.13365e-05	0.00213365	0.01
	35	468.67	0.87	35	2.13365e-05	0.00213365	0.01
	40	468.67	0.87	40	2.13365e-05	0.00213365	0.01
	45	468.67	0.87	45	2.13365e-05	0.00213365	0.01
	50	468.67	0.87	50	2.13365e-05	0.00213365	0.01
B2-1	0	470.86	0.87	0	0	0	0
	5	470.86	0.87	5	0	0	0
	10	470.86	0.87	10	0	0	0
	15	470.86	0.87	15	0	0	0
	20	470.86	0.87	20	0	0	0
	25	470.86	0.87	25	0	0	0
	30	470.86	0.87	30	0	0	0
	35	470.86	0.87	35	0	0	0
	40	470.86	0.87	40	0	0	0
	45	470.86	0.87	45	0	0	0
	50	470.86	0.87	50	0	0	0
B2-2	0	471.03	0.87	0	0	0	0
	5	471.03	0.87	5	0	0	0
	10	471.03	0.87	10	0	0	0
	15	471.03	0.87	15	0	0	0
	20	471.03	0.87	20	0	0	0
	25	471.03	0.87	25	0	0	0
	30	471.03	0.87	30	0	0	0
	35	471.03	0.87	35	0	0	0
	40	471.03	0.87	40	0	0	0
	45	471.02	0.87	45	2.12301e-05	0.00212301	0.01
	50	471.01	0.87	50	4.24601e-05	0.00424601	0.02
B2-3	0	471.61	0.87	0	0	0	0
	5	471.61	0.87	5	0	0	0
	10	471.61	0.87	10	0	0	0
	15	471.61	0.87	15	0	0	0
	20	471.61	0.87	20	0	0	0
	25	471.61	0.87	25	0	0	0
	30	471.61	0.87	30	0	0	0
	35	471.61	0.87	35	0	0	0
	40	471.61	0.87	40	0	0	0
	45	471.61	0.87	45	0	0	0
	50	471.61	0.87	50	0	0	0
C1-1	0	520.78	0.87	0	0	0	0
	5	520.78	0.87	5	0	0	0
	10	520.78	0.87	10	0	0	0
	15	520.78	0.87	15	0	0	0
	20	520.78	0.87	20	0	0	0
	25	520.78	0.87	25	0	0	0
	30	520.78	0.87	30	0	0	0
	35	520.78	0.87	35	0	0	0
	40	520.78	0.87	40	0	0	0
	45	520.78	0.87	45	0	0	0
	50	520.78	0.87	50	0	0	0
C1-2	0	526.25	0.87	0	0	0	0
	5	526.25	0.87	5	0	0	0
	10	526.25	0.87	10	0	0	0
	15	526.25	0.87	15	0	0	0
	20	526.23	0.87	20	3.80048e-05	0.00380048	0.02
	25	526.23	0.87	25	3.80048e-05	0.00380048	0.02
	30	526.22	0.87	30	5.70071e-05	0.00570071	0.03
	35	526.2	0.87	35	9.50119e-05	0.00950119	0.05
	40	526.19	0.87	40	0.000114014	0.0114014	0.06
	45	526.18	0.87	45	0.000133017	0.0133017	0.07
	50	526.16	0.87	50	0.000171021	0.0171021	0.09
C1-3	0	510.68	0.87	0	0	0	0
	5	510.68	0.87	5	0	0	0
	10	510.68	0.87	10	0	0	0
	15	510.68	0.87	15	0	0	0
	20	510.68	0.87	20	0	0	0
	25	510.68	0.87	25	0	0	0
	30	510.68	0.87	30	0	0	0
	35	510.68	0.87	35	0	0	0
	40	510.68	0.87	40	0	0	0
	45	510.67	0.87	45	1.95817e-05	0.00195817	0.01
	50	510.66	0.87	50	3.91635e-05	0.00391635	0.02
C2-1	0	513.1	0.87	0	0	0	0
	5	513.1	0.87	5	0	0	0
	10	513.1	0.87	10	0	0	0
	15	513.1	0.87	15	0	0	0
	20	513.1	0.87	20	0	0	0
	25	513.1	0.87	25	0	0	0
	30	513.1	0.87	30	0	0	0
	35	513.1	0.87	35	0	0	0
	40	513.1	0.87	40	0	0	0
	45	513.1	0.87	45	0	0	0
	50	513.09	0.87	50	1.94894e-05	0.00194894	0.01
C2-2	0	507.59	0.87	0	0	0	0
	5	507.59	0.87	5	0	0	0
	10	507.59	0.87	10	0	0	0
	15	507.59	0.87	15	0	0	0
	20	507.57	0.87	20	3.94019e-05	0.00394019	0.02
	25	507.55	0.87	25	7.88038e-05	0.00788038	0.04
	30	507.53	0.87	30	0.000118206	0.0118206	0.06
	35	507.51	0.87	35	0.000157608	0.0157608	0.08
	40	507.49	0.87	40	0.000197009	0.0197009	0.1
	45	507.47	0.87	45	0.000236411	0.0236411	0.12
	50	507.45	0.87	50	0.000275813	0.0275813	0.14
C2-3	0	514.35	0.87	0	0	0	0
	5	514.35	0.87	5	0	0	0
	10	514.35	0.87	10	0	0	0
	15	514.35	0.87	15	0	0	0
	20	514.35	0.87	20	0	0	0
	25	514.35	0.87	25	0	0	0
	30	514.35	0.87	30	0	0	0
	35	514.35	0.87	35	0	0	0
	40	514.35	0.87	40	0	0	0
	45	514.34	0.87	45	1.9442e-05	0.0019442	0.01
	50	514.33	0.87	50	3.8884e-05	0.0038884	0.02
D1-1	0	482.13	0.87	0	0	0	0
	5	482.13	0.87	5	0	0	0
	10	482.13	0.87	10	0	0	0
	15	482.13	0.87	15	0	0	0
	20	482.13	0.87	20	0	0	0
	25	482.13	0.87	25	0	0	0
	30	482.13	0.87	30	0	0	0
	35	482.13	0.87	35	0	0	0
	40	482.13	0.87	40	0	0	0
	45	482.13	0.87	45	0	0	0
	50	482.13	0.87	50	0	0	0
D1-2	0	483.93	0.87	0	0	0	0
	5	483.93	0.87	5	0	0	0
	10	483.93	0.87	10	0	0	0
	15	483.93	0.87	15	0	0	0
	20	483.93	0.87	20	0	0	0
	25	483.93	0.87	25	0	0	0
	30	483.93	0.87	30	0	0	0
	35	483.93	0.87	35	0	0	0
	40	483.93	0.87	40	0	0	0
	45	483.93	0.87	45	0	0	0
	50	483.93	0.87	50	0	0	0
D1-3	0	474.86	0.87	0	0	0	0
	5	474.86	0.87	5	0	0	0
	10	474.86	0.87	10	0	0	0
	15	474.86	0.87	15	0	0	0
	20	474.86	0.87	20	0	0	0
	25	474.86	0.87	25	0	0	0
	30	474.86	0.87	30	0	0	0
	35	474.86	0.87	35	0	0	0
	40	474.86	0.87	40	0	0	0
	45	474.86	0.87	45	0	0	0
	50	474.86	0.87	50	0	0	0
D2-1	0	478.52	0.87	0	0	0	0
	5	478.52	0.87	5	0	0	0
	10	478.52	0.87	10	0	0	0
	15	478.52	0.87	15	0	0	0
	20	478.52	0.87	20	0	0	0
	25	478.52	0.87	25	0	0	0
	30	478.52	0.87	30	0	0	0
	35	478.52	0.87	35	0	0	0
	40	478.52	0.87	40	0	0	0
	45	478.52	0.87	45	0	0	0
	50	478.52	0.87	50	0	0	0
D2-2	0	484.91	0.87	0	0	0	0
	5	484.91	0.87	5	0	0	0
	10	484.91	0.87	10	0	0	0
	15	484.91	0.87	15	0	0	0
	20	484.91	0.87	20	0	0	0
	25	484.91	0.87	25	0	0	0
	30	484.91	0.87	30	0	0	0
	35	484.91	0.87	35	0	0	0
	40	484.91	0.87	40	0	0	0
	45	484.91	0.87	45	0	0	0
	50	484.91	0.87	50	0	0	0
D2-3	0	472.31	0.87	0	0	0	0
	5	472.31	0.87	5	0	0	0
	10	472.31	0.87	10	0	0	0
	15	472.31	0.87	15	0	0	0
	20	472.31	0.87	20	0	0	0
	25	472.31	0.87	25	0	0	0
	30	472.31	0.87	30	0	0	0
	35	472.31	0.87	35	0	0	0
	40	472.31	0.87	40	0	0	0
	45	472.31	0.87	45	0	0	0
	50	472.31	0.87	50	0	0	0

## Sheet: 2. hız
NUMUNE ADI	MESAFE (km)	AĞIRLIK (g)	Hız	Mesafe	Ağırlık kaybı (oransal)	Ağırlık kaybı (%)	Ağırlık Kaybı (g)						Ağırlık kaybı (%)								Ağırlık kaybı (g)
S1-1	0	487.37	1.63	0	0	0	0				Hız	Mesafe	1. Tek	2. Tek	3. Tek	Ort			Hız	Mesafe	1. Tek	2. Tek	3. Tek	Ort
	5	487.29	1.63	5	0.000164146	0.0164146	0.08			S1	1.63	0	0	0	0	0		S1	1.63	0	0	0	0	0
	10	487.14	1.63	10	0.000471921	0.0471921	0.23			S1	1.63	5	0.0164146	0.016447	0.0144119	0.0157579		S1	1.63	5	0.08	0.08	0.07	0.0766667
	15	486.96	1.63	15	0.00084125	0.084125	0.41			S1	1.63	10	0.0471921	0.0493411	0.0473534	0.0479622		S1	1.63	10	0.23	0.24	0.23	0.233333
	20	486.74	1.63	20	0.00129265	0.129265	0.63			S1	1.63	15	0.084125	0.0863469	0.0844125	0.0849615		S1	1.63	15	0.41	0.42	0.41	0.413333
	25	486.46	1.63	25	0.00186716	0.186716	0.91			S1	1.63	20	0.129265	0.131576	0.129707	0.130183		S1	1.63	20	0.63	0.64	0.63	0.633333
	30	486.11	1.63	30	0.0025853	0.25853	1.26			S1	1.63	25	0.186716	0.187085	0.185296	0.186366		S1	1.63	25	0.91	0.91	0.9	0.906667
	35	485.69	1.63	35	0.00344707	0.344707	1.68			S1	1.63	30	0.25853	0.267264	0.257355	0.26105		S1	1.63	30	1.26	1.3	1.25	1.27
	40	485.16	1.63	40	0.00453454	0.453454	2.21			S1	1.63	35	0.344707	0.353611	0.347944	0.348754		S1	1.63	35	1.68	1.72	1.69	1.69667
	45	484.55	1.63	45	0.00578616	0.578616	2.82			S1	1.63	40	0.453454	0.462573	0.459122	0.458383		S1	1.63	40	2.21	2.25	2.23	2.23
	50	483.85	1.63	50	0.00722244	0.722244	3.52			S1	1.63	45	0.578616	0.587981	0.584711	0.583769		S1	1.63	45	2.82	2.86	2.84	2.84
S1-2	0	486.41	1.63	0	0	0	0			S1	1.63	50	0.722244	0.731893	0.72883	0.727656		S1	1.63	50	3.52	3.56	3.54	3.54
	5	486.33	1.63	5	0.00016447	0.016447	0.08			S2	1.63	0	0	0	0	0		S2	1.63	0	0	0	0	0
	10	486.17	1.63	10	0.000493411	0.0493411	0.24			S2	1.63	5	0.0143655	0.0183195	0.0164315	0.0163721		S2	1.63	5	0.07	0.09	0.08	0.08
	15	485.99	1.63	15	0.000863469	0.0863469	0.42			S2	1.63	10	0.0430964	0.048852	0.0472405	0.0463963		S2	1.63	10	0.21	0.24	0.23	0.226667
	20	485.77	1.63	20	0.00131576	0.131576	0.64			S2	1.63	15	0.0820883	0.0875265	0.0862653	0.0852934		S2	1.63	15	0.4	0.43	0.42	0.416667
	25	485.5	1.63	25	0.00187085	0.187085	0.91			S2	1.63	20	0.129289	0.134343	0.133506	0.132379		S2	1.63	20	0.63	0.66	0.65	0.646667
	30	485.11	1.63	30	0.00267264	0.267264	1.3			S2	1.63	25	0.186751	0.193372	0.191016	0.19038		S2	1.63	25	0.91	0.95	0.93	0.93
	35	484.69	1.63	35	0.00353611	0.353611	1.72			S2	1.63	30	0.258578	0.268686	0.262904	0.263389		S2	1.63	30	1.26	1.32	1.28	1.28667
	40	484.16	1.63	40	0.00462573	0.462573	2.25			S2	1.63	35	0.348875	0.360283	0.355331	0.35483		S2	1.63	35	1.7	1.77	1.73	1.73333
	45	483.55	1.63	45	0.00587981	0.587981	2.86			S2	1.63	40	0.463799	0.476307	0.472405	0.470837		S2	1.63	40	2.26	2.34	2.3	2.3
	50	482.85	1.63	50	0.00731893	0.731893	3.56			S2	1.63	45	0.588984	0.598437	0.595642	0.594354		S2	1.63	45	2.87	2.94	2.9	2.90333
S1-3	0	485.71	1.63	0	0	0	0			S2	1.63	50	0.732638	0.740922	0.741471	0.738344		S2	1.63	50	3.57	3.64	3.61	3.60667
	5	485.64	1.63	5	0.000144119	0.0144119	0.07			A1	1.63	0	0	0	0	0		A1	1.63	0	0	0	0	0
	10	485.48	1.63	10	0.000473534	0.0473534	0.23			A1	1.63	5	0.00212242	0.00211905	0.00212184	0.0021211		A1	1.63	5	0.01	0.01	0.01	0.01
	15	485.3	1.63	15	0.000844125	0.0844125	0.41			A1	1.63	10	0.00424484	0.0042381	0.00424367	0.0042422		A1	1.63	10	0.02	0.02	0.02	0.02
	20	485.08	1.63	20	0.00129707	0.129707	0.63			A1	1.63	15	0.00636726	0.00635714	0.00636551	0.00636331		A1	1.63	15	0.03	0.03	0.03	0.03
	25	484.81	1.63	25	0.00185296	0.185296	0.9			A1	1.63	20	0.00848969	0.00847619	0.00848734	0.00848441		A1	1.63	20	0.04	0.04	0.04	0.04
	30	484.46	1.63	30	0.00257355	0.257355	1.25			A1	1.63	25	0.0106121	0.0105952	0.0106092	0.0106055		A1	1.63	25	0.05	0.05	0.05	0.05
	35	484.02	1.63	35	0.00347944	0.347944	1.69			A1	1.63	30	0.0127345	0.0127143	0.012731	0.0127266		A1	1.63	30	0.06	0.06	0.06	0.06
	40	483.48	1.63	40	0.00459122	0.459122	2.23			A1	1.63	35	0.0169794	0.0169524	0.0169747	0.0169688		A1	1.63	35	0.08	0.08	0.08	0.08
	45	482.87	1.63	45	0.00584711	0.584711	2.84			A1	1.63	40	0.0191018	0.0190714	0.0212184	0.0197972		A1	1.63	40	0.09	0.09	0.1	0.0933333
	50	482.17	1.63	50	0.0072883	0.72883	3.54			A1	1.63	45	0.0233466	0.0211905	0.0233402	0.0226258		A1	1.63	45	0.11	0.1	0.11	0.106667
S2-1	0	487.28	1.63	0	0	0	0			A1	1.63	50	0.0275915	0.0254286	0.0275839	0.026868		A1	1.63	50	0.13	0.12	0.13	0.126667
	5	487.21	1.63	5	0.000143655	0.0143655	0.07			A2	1.63	0	0	0	0	0		A2	1.63	0	0	0	0	0
	10	487.07	1.63	10	0.000430964	0.0430964	0.21			A2	1.63	5	0.00212094	0.00212377	0.00212085	0.00212185		A2	1.63	5	0.01	0.01	0.01	0.01
	15	486.88	1.63	15	0.000820883	0.0820883	0.4			A2	1.63	10	0.00424187	0.00424755	0.00424169	0.0042437		A2	1.63	10	0.02	0.02	0.02	0.02
	20	486.65	1.63	20	0.00129289	0.129289	0.63			A2	1.63	15	0.00636281	0.00637132	0.00636254	0.00636556		A2	1.63	15	0.03	0.03	0.03	0.03
	25	486.37	1.63	25	0.00186751	0.186751	0.91			A2	1.63	20	0.00848374	0.00849509	0.00848338	0.00848741		A2	1.63	20	0.04	0.04	0.04	0.04
	30	486.02	1.63	30	0.00258578	0.258578	1.26			A2	1.63	25	0.0106047	0.0106189	0.0106042	0.0106093		A2	1.63	25	0.05	0.05	0.05	0.05
	35	485.58	1.63	35	0.00348875	0.348875	1.7			A2	1.63	30	0.0127256	0.0127426	0.0127251	0.0127311		A2	1.63	30	0.06	0.06	0.06	0.06
	40	485.02	1.63	40	0.00463799	0.463799	2.26			A2	1.63	35	0.0148466	0.0148664	0.0148459	0.014853		A2	1.63	35	0.07	0.07	0.07	0.07
	45	484.41	1.63	45	0.00588984	0.588984	2.87			A2	1.63	40	0.0190884	0.019114	0.0169668	0.0183897		A2	1.63	40	0.09	0.09	0.08	0.0866667
	50	483.71	1.63	50	0.00732638	0.732638	3.57			A2	1.63	45	0.0233303	0.0233615	0.0212085	0.0226334		A2	1.63	45	0.11	0.11	0.1	0.106667
S2-2	0	491.28	1.63	0	0	0	0			A2	1.63	50	0.0275722	0.0276091	0.0254501	0.0268771		A2	1.63	50	0.13	0.13	0.12	0.126667
	5	491.19	1.63	5	0.000183195	0.0183195	0.09			B1	1.63	0	0	0	0	0		B1	1.63	0	0	0	0	0
	10	491.04	1.63	10	0.00048852	0.048852	0.24			B1	1.63	5	0.00212008	0.00211986	0.0021337	0.00212455		B1	1.63	5	0.01	0.01	0.01	0.01
	15	490.85	1.63	15	0.000875265	0.0875265	0.43			B1	1.63	10	0.00424016	0.00423971	0.00640109	0.00496032		B1	1.63	10	0.02	0.02	0.03	0.0233333
	20	490.62	1.63	20	0.00134343	0.134343	0.66			B1	1.63	15	0.00636024	0.00635957	0.0106685	0.0077961		B1	1.63	15	0.03	0.03	0.05	0.0366667
	25	490.33	1.63	25	0.00193372	0.193372	0.95			B1	1.63	20	0.00848033	0.00847943	0.0149359	0.0106319		B1	1.63	20	0.04	0.04	0.07	0.05
	30	489.96	1.63	30	0.00268686	0.268686	1.32			B1	1.63	25	0.0127205	0.0105993	0.021337	0.0148856		B1	1.63	25	0.06	0.05	0.1	0.07
	35	489.51	1.63	35	0.00360283	0.360283	1.77			B1	1.63	30	0.0169607	0.014839	0.0256044	0.0191347		B1	1.63	30	0.08	0.07	0.12	0.09
	40	488.94	1.63	40	0.00476307	0.476307	2.34			B1	1.63	35	0.0212008	0.0190787	0.0298718	0.0233838		B1	1.63	35	0.1	0.09	0.14	0.11
	45	488.34	1.63	45	0.00598437	0.598437	2.94			B1	1.63	40	0.025441	0.0233184	0.0362729	0.0283441		B1	1.63	40	0.12	0.11	0.17	0.133333
	50	487.64	1.63	50	0.00740922	0.740922	3.64			B1	1.63	45	0.0318012	0.0275581	0.0405403	0.0332999		B1	1.63	45	0.15	0.13	0.19	0.156667
S2-3	0	486.87	1.63	0	0	0	0			B1	1.63	50	0.0381615	0.0339177	0.0469413	0.0396735		B1	1.63	50	0.18	0.16	0.22	0.186667
	5	486.79	1.63	5	0.000164315	0.0164315	0.08			B2	1.63	0	0	0	0	0		B2	1.63	0	0	0	0	0
	10	486.64	1.63	10	0.000472405	0.0472405	0.23			B2	1.63	5	0.00212377	0.0021231	0.0021204	0.00212242		B2	1.63	5	0.01	0.01	0.01	0.01
	15	486.45	1.63	15	0.000862653	0.0862653	0.42			B2	1.63	10	0.00424755	0.00424619	0.00424079	0.00424484		B2	1.63	10	0.02	0.02	0.02	0.02
	20	486.22	1.63	20	0.00133506	0.133506	0.65			B2	1.63	15	0.00637132	0.00636929	0.00848158	0.00707407		B2	1.63	15	0.03	0.03	0.04	0.0333333
	25	485.94	1.63	25	0.00191016	0.191016	0.93			B2	1.63	20	0.00849509	0.0106155	0.0127224	0.010611		B2	1.63	20	0.04	0.05	0.06	0.05
	30	485.59	1.63	30	0.00262904	0.262904	1.28			B2	1.63	25	0.0106189	0.0148617	0.0169632	0.0141479		B2	1.63	25	0.05	0.07	0.08	0.0666667
	35	485.14	1.63	35	0.00355331	0.355331	1.73			B2	1.63	30	0.0148664	0.0191079	0.021204	0.0183928		B2	1.63	30	0.07	0.09	0.1	0.0866667
	40	484.57	1.63	40	0.00472405	0.472405	2.3			B2	1.63	35	0.019114	0.0233541	0.0254448	0.0226376		B2	1.63	35	0.09	0.11	0.12	0.106667
	45	483.97	1.63	45	0.00595642	0.595642	2.9			B2	1.63	40	0.0233615	0.0276003	0.0296855	0.0268824		B2	1.63	40	0.11	0.13	0.14	0.126667
	50	483.26	1.63	50	0.00741471	0.741471	3.61			B2	1.63	45	0.0297328	0.0339696	0.0360467	0.0332497		B2	1.63	45	0.14	0.16	0.17	0.156667
A1-1	0	471.16	1.63	0	0	0	0			B2	1.63	50	0.0361041	0.0403388	0.0424079	0.039617		B2	1.63	50	0.17	0.19	0.2	0.186667
	5	471.15	1.63	5	2.12242e-05	0.00212242	0.01			C1	1.63	0	0	0	0	0		C1	1.63	0	0	0	0	0
	10	471.14	1.63	10	4.24484e-05	0.00424484	0.02			C1	1.63	5	0.0019202	0.00190056	0.00195825	0.00192634		C1	1.63	5	0.01	0.01	0.01	0.01
	15	471.13	1.63	15	6.36726e-05	0.00636726	0.03			C1	1.63	10	0.00576059	0.00380113	0.0039165	0.00449274		C1	1.63	10	0.03	0.02	0.02	0.0233333
	20	471.12	1.63	20	8.48969e-05	0.00848969	0.04			C1	1.63	15	0.00960098	0.00570169	0.007833	0.00771189		C1	1.63	15	0.05	0.03	0.04	0.04
	25	471.11	1.63	25	0.000106121	0.0106121	0.05			C1	1.63	20	0.0115212	0.00760225	0.0117495	0.010291		C1	1.63	20	0.06	0.04	0.06	0.0533333
	30	471.1	1.63	30	0.000127345	0.0127345	0.06			C1	1.63	25	0.0134414	0.0114034	0.015666	0.0135036		C1	1.63	25	0.07	0.06	0.08	0.07
	35	471.08	1.63	35	0.000169794	0.0169794	0.08			C1	1.63	30	0.0172818	0.0152045	0.0195825	0.0173563		C1	1.63	30	0.09	0.08	0.1	0.09
	40	471.07	1.63	40	0.000191018	0.0191018	0.09			C1	1.63	35	0.0211222	0.0209062	0.023499	0.0218425		C1	1.63	35	0.11	0.11	0.12	0.113333
	45	471.05	1.63	45	0.000233466	0.0233466	0.11			C1	1.63	40	0.0249626	0.0266079	0.0293738	0.0269814		C1	1.63	40	0.13	0.14	0.15	0.14
	50	471.03	1.63	50	0.000275915	0.0275915	0.13			C1	1.63	45	0.0307231	0.0342101	0.0352485	0.0333939		C1	1.63	45	0.16	0.18	0.18	0.173333
A1-2	0	471.91	1.63	0	0	0	0			C1	1.63	50	0.0364837	0.0418124	0.0430815	0.0404592		C1	1.63	50	0.19	0.22	0.22	0.21
	5	471.9	1.63	5	2.11905e-05	0.00211905	0.01			C2	1.63	0	0	0	0	0		C2	1.63	0	0	0	0	0
	10	471.89	1.63	10	4.2381e-05	0.0042381	0.02			C2	1.63	5	0.00389788	0.00197064	0.00194428	0.00260426		C2	1.63	5	0.02	0.01	0.01	0.0133333
	15	471.88	1.63	15	6.35714e-05	0.00635714	0.03			C2	1.63	10	0.00974469	0.00591191	0.00388855	0.00651505		C2	1.63	10	0.05	0.03	0.02	0.0333333
	20	471.87	1.63	20	8.47619e-05	0.00847619	0.04			C2	1.63	15	0.0136426	0.00985319	0.00777711	0.0104243		C2	1.63	15	0.07	0.05	0.04	0.0533333
	25	471.86	1.63	25	0.000105952	0.0105952	0.05			C2	1.63	20	0.0194894	0.0137945	0.0116657	0.0149832		C2	1.63	20	0.1	0.07	0.06	0.0766667
	30	471.85	1.63	30	0.000127143	0.0127143	0.06			C2	1.63	25	0.0253362	0.0197064	0.0155542	0.0201989		C2	1.63	25	0.13	0.1	0.08	0.103333
	35	471.83	1.63	35	0.000169524	0.0169524	0.08			C2	1.63	30	0.031183	0.0256183	0.0194428	0.0254147		C2	1.63	30	0.16	0.13	0.1	0.13
	40	471.82	1.63	40	0.000190714	0.0190714	0.09			C2	1.63	35	0.0370298	0.0315302	0.0252756	0.0312785		C2	1.63	35	0.19	0.16	0.13	0.16
	45	471.81	1.63	45	0.000211905	0.0211905	0.1			C2	1.63	40	0.0428766	0.0394128	0.0311084	0.0377993		C2	1.63	40	0.22	0.2	0.16	0.193333
	50	471.79	1.63	50	0.000254286	0.0254286	0.12			C2	1.63	45	0.0506724	0.0453247	0.0388855	0.0449609		C2	1.63	45	0.26	0.23	0.2	0.23
A1-3	0	471.29	1.63	0	0	0	0			C2	1.63	50	0.0565192	0.0532072	0.0466626	0.0521297		C2	1.63	50	0.29	0.27	0.24	0.266667
	5	471.28	1.63	5	2.12184e-05	0.00212184	0.01			D1	1.63	0	0	0	0	0		D1	1.63	0	0	0	0	0
	10	471.27	1.63	10	4.24367e-05	0.00424367	0.02			D1	1.63	5	0	0	0	0		D1	1.63	5	0	0	0	0
	15	471.26	1.63	15	6.36551e-05	0.00636551	0.03			D1	1.63	10	0.00207413	0.00206641	0.00210588	0.00208214		D1	1.63	10	0.01	0.01	0.01	0.01
	20	471.25	1.63	20	8.48734e-05	0.00848734	0.04			D1	1.63	15	0.00622239	0.00413283	0.00421177	0.00485566		D1	1.63	15	0.03	0.02	0.02	0.0233333
	25	471.24	1.63	25	0.000106092	0.0106092	0.05			D1	1.63	20	0.00829652	0.00826566	0.00631765	0.00762661		D1	1.63	20	0.04	0.04	0.03	0.0366667
	30	471.23	1.63	30	0.00012731	0.012731	0.06			D1	1.63	25	0.0103706	0.0123985	0.0105294	0.0110995		D1	1.63	25	0.05	0.06	0.05	0.0533333
	35	471.21	1.63	35	0.000169747	0.0169747	0.08			D1	1.63	30	0.0124448	0.0165313	0.0147412	0.0145724		D1	1.63	30	0.06	0.08	0.07	0.07
	40	471.19	1.63	40	0.000212184	0.0212184	0.1			D1	1.63	35	0.016593	0.0206641	0.018953	0.0187367		D1	1.63	35	0.08	0.1	0.09	0.09
	45	471.18	1.63	45	0.000233402	0.0233402	0.11			D1	1.63	40	0.0186672	0.024797	0.0210588	0.0215077		D1	1.63	40	0.09	0.12	0.1	0.103333
	50	471.16	1.63	50	0.000275839	0.0275839	0.13			D1	1.63	45	0.0228154	0.0289298	0.0252706	0.0256719		D1	1.63	45	0.11	0.14	0.12	0.123333
A2-1	0	471.49	1.63	0	0	0	0			D1	1.63	50	0.0269637	0.035129	0.0294824	0.030525		D1	1.63	50	0.13	0.17	0.14	0.146667
	5	471.48	1.63	5	2.12094e-05	0.00212094	0.01			D2	1.63	0	0	0	0	0		D2	1.63	0	0	0	0	0
	10	471.47	1.63	10	4.24187e-05	0.00424187	0.02			D2	1.63	5	0	0	0	0		D2	1.63	5	0	0	0	0
	15	471.46	1.63	15	6.36281e-05	0.00636281	0.03			D2	1.63	10	0.00417955	0.00412448	0.00423451	0.00417951		D2	1.63	10	0.02	0.02	0.02	0.02
	20	471.45	1.63	20	8.48374e-05	0.00848374	0.04			D2	1.63	15	0.00835911	0.00824895	0.00846901	0.00835902		D2	1.63	15	0.04	0.04	0.04	0.04
	25	471.44	1.63	25	0.000106047	0.0106047	0.05			D2	1.63	20	0.0125387	0.0123734	0.0127035	0.0125385		D2	1.63	20	0.06	0.06	0.06	0.06
	30	471.43	1.63	30	0.000127256	0.0127256	0.06			D2	1.63	25	0.0167182	0.0164979	0.0148208	0.0160123		D2	1.63	25	0.08	0.08	0.07	0.0766667
	35	471.42	1.63	35	0.000148466	0.0148466	0.07			D2	1.63	30	0.0229875	0.0206224	0.0190553	0.0208884		D2	1.63	30	0.11	0.1	0.09	0.1
	40	471.4	1.63	40	0.000190884	0.0190884	0.09			D2	1.63	35	0.0292569	0.0247469	0.025407	0.0264703		D2	1.63	35	0.14	0.12	0.12	0.126667
	45	471.38	1.63	45	0.000233303	0.0233303	0.11			D2	1.63	40	0.0355262	0.0288713	0.0317588	0.0320521		D2	1.63	40	0.17	0.14	0.15	0.153333
	50	471.36	1.63	50	0.000275722	0.0275722	0.13			D2	1.63	45	0.0417955	0.0329958	0.0381106	0.037634		D2	1.63	45	0.2	0.16	0.18	0.18
A2-2	0	470.86	1.63	0	0	0	0			D2	1.63	50	0.0501546	0.0391825	0.0465796	0.0453056		D2	1.63	50	0.24	0.19	0.22	0.216667
	5	470.85	1.63	5	2.12377e-05	0.00212377	0.01
	10	470.84	1.63	10	4.24755e-05	0.00424755	0.02
	15	470.83	1.63	15	6.37132e-05	0.00637132	0.03
	20	470.82	1.63	20	8.49509e-05	0.00849509	0.04
	25	470.81	1.63	25	0.000106189	0.0106189	0.05
	30	470.8	1.63	30	0.000127426	0.0127426	0.06
	35	470.79	1.63	35	0.000148664	0.0148664	0.07
	40	470.77	1.63	40	0.00019114	0.019114	0.09
	45	470.75	1.63	45	0.000233615	0.0233615	0.11
	50	470.73	1.63	50	0.000276091	0.0276091	0.13
A2-3	0	471.51	1.63	0	0	0	0
	5	471.5	1.63	5	2.12085e-05	0.00212085	0.01
	10	471.49	1.63	10	4.24169e-05	0.00424169	0.02
	15	471.48	1.63	15	6.36254e-05	0.00636254	0.03
	20	471.47	1.63	20	8.48338e-05	0.00848338	0.04
	25	471.46	1.63	25	0.000106042	0.0106042	0.05
	30	471.45	1.63	30	0.000127251	0.0127251	0.06
	35	471.44	1.63	35	0.000148459	0.0148459	0.07
	40	471.43	1.63	40	0.000169668	0.0169668	0.08
	45	471.41	1.63	45	0.000212085	0.0212085	0.1
	50	471.39	1.63	50	0.000254501	0.0254501	0.12
B1-1	0	471.68	1.63	0	0	0	0
	5	471.67	1.63	5	2.12008e-05	0.00212008	0.01
	10	471.66	1.63	10	4.24016e-05	0.00424016	0.02
	15	471.65	1.63	15	6.36024e-05	0.00636024	0.03
	20	471.64	1.63	20	8.48033e-05	0.00848033	0.04
	25	471.62	1.63	25	0.000127205	0.0127205	0.06
	30	471.6	1.63	30	0.000169607	0.0169607	0.08
	35	471.58	1.63	35	0.000212008	0.0212008	0.1
	40	471.56	1.63	40	0.00025441	0.025441	0.12
	45	471.53	1.63	45	0.000318012	0.0318012	0.15
	50	471.5	1.63	50	0.000381615	0.0381615	0.18
B1-2	0	471.73	1.63	0	0	0	0
	5	471.72	1.63	5	2.11986e-05	0.00211986	0.01
	10	471.71	1.63	10	4.23971e-05	0.00423971	0.02
	15	471.7	1.63	15	6.35957e-05	0.00635957	0.03
	20	471.69	1.63	20	8.47943e-05	0.00847943	0.04
	25	471.68	1.63	25	0.000105993	0.0105993	0.05
	30	471.66	1.63	30	0.00014839	0.014839	0.07
	35	471.64	1.63	35	0.000190787	0.0190787	0.09
	40	471.62	1.63	40	0.000233184	0.0233184	0.11
	45	471.6	1.63	45	0.000275581	0.0275581	0.13
	50	471.57	1.63	50	0.000339177	0.0339177	0.16
B1-3	0	468.67	1.63	0	0	0	0
	5	468.66	1.63	5	2.1337e-05	0.0021337	0.01
	10	468.64	1.63	10	6.40109e-05	0.00640109	0.03
	15	468.62	1.63	15	0.000106685	0.0106685	0.05
	20	468.6	1.63	20	0.000149359	0.0149359	0.07
	25	468.57	1.63	25	0.00021337	0.021337	0.1
	30	468.55	1.63	30	0.000256044	0.0256044	0.12
	35	468.53	1.63	35	0.000298718	0.0298718	0.14
	40	468.5	1.63	40	0.000362729	0.0362729	0.17
	45	468.48	1.63	45	0.000405403	0.0405403	0.19
	50	468.45	1.63	50	0.000469413	0.0469413	0.22
B2-1	0	470.86	1.63	0	0	0	0
	5	470.85	1.63	5	2.12377e-05	0.00212377	0.01
	10	470.84	1.63	10	4.24755e-05	0.00424755	0.02
	15	470.83	1.63	15	6.37132e-05	0.00637132	0.03
	20	470.82	1.63	20	8.49509e-05	0.00849509	0.04
	25	470.81	1.63	25	0.000106189	0.0106189	0.05
	30	470.79	1.63	30	0.000148664	0.0148664	0.07
	35	470.77	1.63	35	0.00019114	0.019114	0.09
	40	470.75	1.63	40	0.000233615	0.0233615	0.11
	45	470.72	1.63	45	0.000297328	0.0297328	0.14
	50	470.69	1.63	50	0.000361041	0.0361041	0.17
B2-2	0	471.01	1.63	0	0	0	0
	5	471	1.63	5	2.1231e-05	0.0021231	0.01
	10	470.99	1.63	10	4.24619e-05	0.00424619	0.02
	15	470.98	1.63	15	6.36929e-05	0.00636929	0.03
	20	470.96	1.63	20	0.000106155	0.0106155	0.05
	25	470.94	1.63	25	0.000148617	0.0148617	0.07
	30	470.92	1.63	30	0.000191079	0.0191079	0.09
	35	470.9	1.63	35	0.000233541	0.0233541	0.11
	40	470.88	1.63	40	0.000276003	0.0276003	0.13
	45	470.85	1.63	45	0.000339696	0.0339696	0.16
	50	470.82	1.63	50	0.000403388	0.0403388	0.19
B2-3	0	471.61	1.63	0	0	0	0
	5	471.6	1.63	5	2.1204e-05	0.0021204	0.01
	10	471.59	1.63	10	4.24079e-05	0.00424079	0.02
	15	471.57	1.63	15	8.48158e-05	0.00848158	0.04
	20	471.55	1.63	20	0.000127224	0.0127224	0.06
	25	471.53	1.63	25	0.000169632	0.0169632	0.08
	30	471.51	1.63	30	0.00021204	0.021204	0.1
	35	471.49	1.63	35	0.000254448	0.0254448	0.12
	40	471.47	1.63	40	0.000296855	0.0296855	0.14
	45	471.44	1.63	45	0.000360467	0.0360467	0.17
	50	471.41	1.63	50	0.000424079	0.0424079	0.2
C1-1	0	520.78	1.63	0	0	0	0
	5	520.77	1.63	5	1.9202e-05	0.0019202	0.01
	10	520.75	1.63	10	5.76059e-05	0.00576059	0.03
	15	520.73	1.63	15	9.60098e-05	0.00960098	0.05
	20	520.72	1.63	20	0.000115212	0.0115212	0.06
	25	520.71	1.63	25	0.000134414	0.0134414	0.07
	30	520.69	1.63	30	0.000172818	0.0172818	0.09
	35	520.67	1.63	35	0.000211222	0.0211222	0.11
	40	520.65	1.63	40	0.000249626	0.0249626	0.13
	45	520.62	1.63	45	0.000307231	0.0307231	0.16
	50	520.59	1.63	50	0.000364837	0.0364837	0.19
C1-2	0	526.16	1.63	0	0	0	0
	5	526.15	1.63	5	1.90056e-05	0.00190056	0.01
	10	526.14	1.63	10	3.80113e-05	0.00380113	0.02
	15	526.13	1.63	15	5.70169e-05	0.00570169	0.03
	20	526.12	1.63	20	7.60225e-05	0.00760225	0.04
	25	526.1	1.63	25	0.000114034	0.0114034	0.06
	30	526.08	1.63	30	0.000152045	0.0152045	0.08
	35	526.05	1.63	35	0.000209062	0.0209062	0.11
	40	526.02	1.63	40	0.000266079	0.0266079	0.14
	45	525.98	1.63	45	0.000342101	0.0342101	0.18
	50	525.94	1.63	50	0.000418124	0.0418124	0.22
C1-3	0	510.66	1.63	0	0	0	0
	5	510.65	1.63	5	1.95825e-05	0.00195825	0.01
	10	510.64	1.63	10	3.9165e-05	0.0039165	0.02
	15	510.62	1.63	15	7.833e-05	0.007833	0.04
	20	510.6	1.63	20	0.000117495	0.0117495	0.06
	25	510.58	1.63	25	0.00015666	0.015666	0.08
	30	510.56	1.63	30	0.000195825	0.0195825	0.1
	35	510.54	1.63	35	0.00023499	0.023499	0.12
	40	510.51	1.63	40	0.000293738	0.0293738	0.15
	45	510.48	1.63	45	0.000352485	0.0352485	0.18
	50	510.44	1.63	50	0.000430815	0.0430815	0.22
C2-1	0	513.1	1.63	0	0	0	0
	5	513.08	1.63	5	3.89788e-05	0.00389788	0.02
	10	513.05	1.63	10	9.74469e-05	0.00974469	0.05
	15	513.03	1.63	15	0.000136426	0.0136426	0.07
	20	513	1.63	20	0.000194894	0.0194894	0.1
	25	512.97	1.63	25	0.000253362	0.0253362	0.13
	30	512.94	1.63	30	0.00031183	0.031183	0.16
	35	512.91	1.63	35	0.000370298	0.0370298	0.19
	40	512.88	1.63	40	0.000428766	0.0428766	0.22
	45	512.84	1.63	45	0.000506724	0.0506724	0.26
	50	512.81	1.63	50	0.000565192	0.0565192	0.29
C2-2	0	507.45	1.63	0	0	0	0
	5	507.44	1.63	5	1.97064e-05	0.00197064	0.01
	10	507.42	1.63	10	5.91191e-05	0.00591191	0.03
	15	507.4	1.63	15	9.85319e-05	0.00985319	0.05
	20	507.38	1.63	20	0.000137945	0.0137945	0.07
	25	507.35	1.63	25	0.000197064	0.0197064	0.1
	30	507.32	1.63	30	0.000256183	0.0256183	0.13
	35	507.29	1.63	35	0.000315302	0.0315302	0.16
	40	507.25	1.63	40	0.000394128	0.0394128	0.2
	45	507.22	1.63	45	0.000453247	0.0453247	0.23
	50	507.18	1.63	50	0.000532072	0.0532072	0.27
C2-3	0	514.33	1.63	0	0	0	0
	5	514.32	1.63	5	1.94428e-05	0.00194428	0.01
	10	514.31	1.63	10	3.88855e-05	0.00388855	0.02
	15	514.29	1.63	15	7.77711e-05	0.00777711	0.04
	20	514.27	1.63	20	0.000116657	0.0116657	0.06
	25	514.25	1.63	25	0.000155542	0.0155542	0.08
	30	514.23	1.63	30	0.000194428	0.0194428	0.1
	35	514.2	1.63	35	0.000252756	0.0252756	0.13
	40	514.17	1.63	40	0.000311084	0.0311084	0.16
	45	514.13	1.63	45	0.000388855	0.0388855	0.2
	50	514.09	1.63	50	0.000466626	0.0466626	0.24
D1-1	0	482.13	1.63	0	0	0	0
	5	482.13	1.63	5	0	0	0
	10	482.12	1.63	10	2.07413e-05	0.00207413	0.01
	15	482.1	1.63	15	6.22239e-05	0.00622239	0.03
	20	482.09	1.63	20	8.29652e-05	0.00829652	0.04
	25	482.08	1.63	25	0.000103706	0.0103706	0.05
	30	482.07	1.63	30	0.000124448	0.0124448	0.06
	35	482.05	1.63	35	0.00016593	0.016593	0.08
	40	482.04	1.63	40	0.000186672	0.0186672	0.09
	45	482.02	1.63	45	0.000228154	0.0228154	0.11
	50	482	1.63	50	0.000269637	0.0269637	0.13
D1-2	0	483.93	1.63	0	0	0	0
	5	483.93	1.63	5	0	0	0
	10	483.92	1.63	10	2.06641e-05	0.00206641	0.01
	15	483.91	1.63	15	4.13283e-05	0.00413283	0.02
	20	483.89	1.63	20	8.26566e-05	0.00826566	0.04
	25	483.87	1.63	25	0.000123985	0.0123985	0.06
	30	483.85	1.63	30	0.000165313	0.0165313	0.08
	35	483.83	1.63	35	0.000206641	0.0206641	0.1
	40	483.81	1.63	40	0.00024797	0.024797	0.12
	45	483.79	1.63	45	0.000289298	0.0289298	0.14
	50	483.76	1.63	50	0.00035129	0.035129	0.17
D1-3	0	474.86	1.63	0	0	0	0
	5	474.86	1.63	5	0	0	0
	10	474.85	1.63	10	2.10588e-05	0.00210588	0.01
	15	474.84	1.63	15	4.21177e-05	0.00421177	0.02
	20	474.83	1.63	20	6.31765e-05	0.00631765	0.03
	25	474.81	1.63	25	0.000105294	0.0105294	0.05
	30	474.79	1.63	30	0.000147412	0.0147412	0.07
	35	474.77	1.63	35	0.00018953	0.018953	0.09
	40	474.76	1.63	40	0.000210588	0.0210588	0.1
	45	474.74	1.63	45	0.000252706	0.0252706	0.12
	50	474.72	1.63	50	0.000294824	0.0294824	0.14
D2-1	0	478.52	1.63	0	0	0	0
	5	478.52	1.63	5	0	0	0
	10	478.5	1.63	10	4.17955e-05	0.00417955	0.02
	15	478.48	1.63	15	8.35911e-05	0.00835911	0.04
	20	478.46	1.63	20	0.000125387	0.0125387	0.06
	25	478.44	1.63	25	0.000167182	0.0167182	0.08
	30	478.41	1.63	30	0.000229875	0.0229875	0.11
	35	478.38	1.63	35	0.000292569	0.0292569	0.14
	40	478.35	1.63	40	0.000355262	0.0355262	0.17
	45	478.32	1.63	45	0.000417955	0.0417955	0.2
	50	478.28	1.63	50	0.000501546	0.0501546	0.24
D2-2	0	484.91	1.63	0	0	0	0
	5	484.91	1.63	5	0	0	0
	10	484.89	1.63	10	4.12448e-05	0.00412448	0.02
	15	484.87	1.63	15	8.24895e-05	0.00824895	0.04
	20	484.85	1.63	20	0.000123734	0.0123734	0.06
	25	484.83	1.63	25	0.000164979	0.0164979	0.08
	30	484.81	1.63	30	0.000206224	0.0206224	0.1
	35	484.79	1.63	35	0.000247469	0.0247469	0.12
	40	484.77	1.63	40	0.000288713	0.0288713	0.14
	45	484.75	1.63	45	0.000329958	0.0329958	0.16
	50	484.72	1.63	50	0.000391825	0.0391825	0.19
D2-3	0	472.31	1.63	0	0	0	0
	5	472.31	1.63	5	0	0	0
	10	472.29	1.63	10	4.23451e-05	0.00423451	0.02
	15	472.27	1.63	15	8.46901e-05	0.00846901	0.04
	20	472.25	1.63	20	0.000127035	0.0127035	0.06
	25	472.24	1.63	25	0.000148208	0.0148208	0.07
	30	472.22	1.63	30	0.000190553	0.0190553	0.09
	35	472.19	1.63	35	0.00025407	0.025407	0.12
	40	472.16	1.63	40	0.000317588	0.0317588	0.15
	45	472.13	1.63	45	0.000381106	0.0381106	0.18
	50	472.09	1.63	50	0.000465796	0.0465796	0.22

## Sheet: S (hız+)
			Ağırlık kaybı (%)								Ağırlık (g)										Ağırlık kaybı (%)							Ağırlık (g)
	Hız	Mesafe	1. Tek	2. Tek	3. Tek	Ort	Akkarekök		Hız	Mesafe	1. Tek	2. Tek	3. Tek	Ort	karekok	AK_g_ln	AK_g_log		Hız	Mesafe	1. Tek	2. Tek	3. Tek	Ort		Hız	Mesafe	1. Tek	2. Tek	3. Tek	Ort	Karekok
S1	0.87	0	0	0	0	0	0		0.87	0	0	0	0	0.0001	0.01	-9.21034	-4	S2	0.87	0	0	0	0	0		0.87	0	0	0	0	0	0
S1	0.87	5	0.00615044	0.00410846	0.0041137	0.00479087	0.0692161		0.87	5	0.03	0.02	0.02	0.0233333	0.152753	-3.75787	-1.63202	S2	0.87	5	0.00205065	0.00203393	0.002052	0.00204552		0.87	5	0.01	0.01	0.01	0.01	0.1
S1	0.87	10	0.0102507	0.00821693	0.00822741	0.00889836	0.0943311		0.87	10	0.05	0.04	0.04	0.0433333	0.208167	-3.13883	-1.36318	S2	0.87	10	0.00615195	0.00610178	0.00615599	0.00613657		0.87	10	0.03	0.03	0.03	0.03	0.173205
S1	0.87	15	0.014351	0.0123254	0.0123411	0.0130058	0.114043		0.87	15	0.07	0.06	0.06	0.0633333	0.251661	-2.75934	-1.19837	S2	0.87	15	0.0102533	0.0101696	0.01026	0.0102276		0.87	15	0.05	0.05	0.05	0.05	0.223607
S1	0.87	20	0.0205015	0.0184881	0.0185117	0.0191671	0.138445		0.87	20	0.1	0.09	0.09	0.0933333	0.305505	-2.37158	-1.02996	S2	0.87	20	0.0164052	0.0162714	0.016416	0.0163642		0.87	20	0.08	0.08	0.08	0.08	0.282843
S1	0.87	25	0.0266519	0.0246508	0.0267391	0.0260139	0.161288		0.87	25	0.13	0.12	0.13	0.126667	0.355903	-2.0662	-0.897338	S2	0.87	25	0.0225572	0.0223732	0.024624	0.0231848		0.87	25	0.11	0.11	0.12	0.113333	0.33665
S1	0.87	30	0.0348525	0.0328677	0.0370233	0.0349145	0.186854		0.87	30	0.17	0.16	0.18	0.17	0.412311	-1.77196	-0.769551	S2	0.87	30	0.0287091	0.0305089	0.034884	0.0313673		0.87	30	0.14	0.15	0.17	0.153333	0.391578
S1	0.87	35	0.0430531	0.0410846	0.0493644	0.0445007	0.210952		0.87	35	0.21	0.2	0.24	0.216667	0.465475	-1.5294	-0.664208	S2	0.87	35	0.0369117	0.0386446	0.0471959	0.0409174		0.87	35	0.18	0.19	0.23	0.2	0.447214
S1	0.87	40	0.0533038	0.0513558	0.0617055	0.055455	0.235489		0.87	40	0.26	0.25	0.3	0.27	0.519615	-1.30933	-0.568636	S2	0.87	40	0.047165	0.0488142	0.0595079	0.051829		0.87	40	0.23	0.24	0.29	0.253333	0.503322
S1	0.87	45	0.0676548	0.0657354	0.0781604	0.0705169	0.26555		0.87	45	0.33	0.32	0.38	0.343333	0.585947	-1.06905	-0.464284	S2	0.87	45	0.0615195	0.0630517	0.0759239	0.0668317		0.87	45	0.3	0.31	0.37	0.326667	0.571548
S1	0.87	50	0.0820059	0.080115	0.096672	0.0862643	0.293708		0.87	50	0.4	0.39	0.47	0.42	0.648074	-0.867501	-0.376751	S2	0.87	50	0.0758741	0.0772892	0.0943919	0.0825184		0.87	50	0.37	0.38	0.46	0.403333	0.635085
S1	1.63	0	0	0	0	0	0		1.63	0	0	0	0	0.0001	0.01	-9.21034	-4	S2	1.63	0	0	0	0	0		1.63	0	0	0	0	0	0
S1	1.63	5	0.0164146	0.016447	0.0144119	0.0157579	0.12553		1.63	5	0.08	0.08	0.07	0.0766667	0.276887	-2.56829	-1.11539	S2	1.63	5	0.0143655	0.0183195	0.0164315	0.0163721		1.63	5	0.07	0.09	0.08	0.08	0.282843
S1	1.63	10	0.0471921	0.0493411	0.0473534	0.0479622	0.219003		1.63	10	0.23	0.24	0.23	0.233333	0.483046	-1.45529	-0.632023	S2	1.63	10	0.0430964	0.048852	0.0472405	0.0463963		1.63	10	0.21	0.24	0.23	0.226667	0.476095
S1	1.63	15	0.084125	0.0863469	0.0844125	0.0849615	0.291482		1.63	15	0.41	0.42	0.41	0.413333	0.64291	-0.883501	-0.3837	S2	1.63	15	0.0820883	0.0875265	0.0862653	0.0852934		1.63	15	0.4	0.43	0.42	0.416667	0.645497
S1	1.63	20	0.129265	0.131576	0.129707	0.130183	0.360809		1.63	20	0.63	0.64	0.63	0.633333	0.795822	-0.456758	-0.198368	S2	1.63	20	0.129289	0.134343	0.133506	0.132379		1.63	20	0.63	0.66	0.65	0.646667	0.804156
S1	1.63	25	0.186716	0.187085	0.185296	0.186366	0.431701		1.63	25	0.91	0.91	0.9	0.906667	0.95219	-0.0979804	-0.0425524	S2	1.63	25	0.186751	0.193372	0.191016	0.19038		1.63	25	0.91	0.95	0.93	0.93	0.964365
S1	1.63	30	0.25853	0.267264	0.257355	0.26105	0.510931		1.63	30	1.26	1.3	1.25	1.27	1.12694	0.239017	0.103804	S2	1.63	30	0.258578	0.268686	0.262904	0.263389		1.63	30	1.26	1.32	1.28	1.28667	1.13431
S1	1.63	35	0.344707	0.353611	0.347944	0.348754	0.590554		1.63	35	1.68	1.72	1.69	1.69667	1.30256	0.528666	0.229597	S2	1.63	35	0.348875	0.360283	0.355331	0.35483		1.63	35	1.7	1.77	1.73	1.73333	1.31656
S1	1.63	40	0.453454	0.462573	0.459122	0.458383	0.67704		1.63	40	2.21	2.25	2.23	2.23	1.49332	0.802002	0.348305	S2	1.63	40	0.463799	0.476307	0.472405	0.470837		1.63	40	2.26	2.34	2.3	2.3	1.51658
S1	1.63	45	0.578616	0.587981	0.584711	0.583769	0.764048		1.63	45	2.82	2.86	2.84	2.84	1.68523	1.0438	0.453318	S2	1.63	45	0.588984	0.598437	0.595642	0.594354		1.63	45	2.87	2.94	2.9	2.90333	1.70392
S1	1.63	50	0.722244	0.731893	0.72883	0.727656	0.853027		1.63	50	3.52	3.56	3.54	3.54	1.88149	1.26413	0.549003	S2	1.63	50	0.732638	0.740922	0.741471	0.738344		1.63	50	3.57	3.64	3.61	3.60667	1.89912
ÖZET ÇIKIŞI												ÖZET ÇIKIŞI														ÖZET ÇIKIŞI
Regresyon İstatistikleri												Regresyon İstatistikleri														Regresyon İstatistikleri
Çoklu R	0.840913											Çoklu R	0.840519													Çoklu R	0.963709
R Kare	0.707135											R Kare	0.706472													R Kare	0.928734
Ayarlı R Kare	0.676307											Ayarlı R Kare	0.675574													Ayarlı R Kare	0.809705
Standart Hata	0.116712											Standart Hata	0.119474													Standart Hata	0.341769
Gözlem	22											Gözlem	22													Gözlem	11
ANOVA												ANOVA														ANOVA
	df	SS	MS	F	Anlamlılık F								df	SS	MS			F	Anlamlılık F								df	SS	MS	F	Anlamlılık F
Regresyon	2	0.624909	0.312454	22.9381	8.57722e-06							Regresyon	2	0.652744	0.326372			22.8649	8.76332e-06							Regresyon	2	13.6999	6.84997	117.288	1.18296e-06
Fark	19	0.258811	0.0136216									Fark	19	0.271205	0.0142739											Fark	9	1.05125	0.116806
Toplam	21	0.883719										Toplam	21	0.923948												Toplam	11	14.7512
	Katsayılar	Standart Hata	t Stat	P-değeri	Düşük %95	Yüksek %95		Düşük 95.0%	Yüksek 95.0%				Katsayılar	Standart Hata	t Stat			P-değeri	Düşük %95	Yüksek %95	Düşük 95.0%	Yüksek 95.0%					Katsayılar	Standart Hata	t Stat	P-değeri	Düşük %95	Yüksek %95	Düşük 95.0%	Yüksek 95.0%
Kesişim	-0.42319	0.0941639	-4.49419	0.000248439	-0.620277	-0.226103		-0.620277	-0.226103			Kesişim	-0.437135	0.0963921	-4.53497			0.00022649	-0.638886	-0.235384	-0.638886	-0.235384				Kesişim	-0.48	0.192784	-2.48984	0.0344311	-0.916107	-0.0438933	-0.916107	-0.0438933
X Değişkeni 1	0.296808	0.0654816	4.53269	0.000227661	0.159753	0.433863		0.159753	0.433863			X Değişkeni 1	0.306358	0.0670312	4.57038			0.000209022	0.16606	0.446656	0.16606	0.446656				X Değişkeni 1	0	0	65535	#NUM!	0	0	0	0
X Değişkeni 2	0.00792061	0.00157374	5.03298	7.38585e-05	0.00462673	0.0112145		0.00462673	0.0112145			X Değişkeni 2	0.00802932	0.00161098	4.98412			8.23708e-05	0.00465749	0.0114011	0.00465749	0.0114011				X Değişkeni 2	0.0705818	0.00651727	10.83	#NUM!	0.0558387	0.0853249	0.0558387	0.0853249
	ÖZET ÇIKIŞI
	Regresyon İstatistikleri
	Çoklu R	0.929117
	R Kare	0.863258
	Ayarlı R Kare	0.848865
	Standart Hata	0.0941614
	Gözlem	22
	ANOVA
		df	SS	MS	F	Anlamlılık F
	Regresyon	2	1.06351	0.531753	59.9741	6.18095e-09
	Fark	19	0.168461	0.00886638
	Toplam	21	1.23197
		Katsayılar	Standart Hata	t Stat	P-değeri	Düşük %95	Yüksek %95	Düşük 95.0%	Yüksek 95.0%
	Kesişim	-0.42652	0.0759701	-5.61431	2.05475e-05	-0.585528	-0.267513	-0.585528	-0.267513
	X Değişkeni 1	0.365341	0.0528297	6.91544	1.35815e-06	0.254767	0.475914	0.254767	0.475914
	X Değişkeni 2	0.0107829	0.00126967	8.49264	6.82228e-08	0.00812542	0.0134403	0.00812542	0.0134403

## Sheet: A (hız+)
			Ağırlık kaybı (%)								Ağırlık (g)									Ağırlık kaybı (%)							Ağırlık (g)
	Hız	Mesafe	1. Tek	2. Tek	3. Tek	Ort			Hız	Mesafe	1. Tek	2. Tek	3. Tek	Ort	Karekök			Hız	Mesafe	1. Tek	2. Tek	3. Tek	Ort		Hız	Mesafe	1. Tek	2. Tek	3. Tek	Ort	Karekok	Model	Y
A1	0.87	0	0	0	0	0			0.87	0	0	0	0	0	0		A2	0.87	0	0	0	0	0		0.87	0	0	0	0	0	0	-0.078194	0.0061143
A1	0.87	5	0	0	0	0			0.87	5	0	0	0	0	0		A2	0.87	5	0	0	0	0		0.87	5	0	0	0	0	0	-0.057324	0.00328604
A1	0.87	10	0	0	0	0			0.87	10	0	0	0	0	0		A2	0.87	10	0	0	0	0		0.87	10	0	0	0	0	0	-0.036454	0.00132889
A1	0.87	15	0	0	0	0			0.87	15	0	0	0	0	0		A2	0.87	15	0	0	0	0		0.87	15	0	0	0	0	0	-0.015584	0.000242861
A1	0.87	20	0	0	0	0			0.87	20	0	0	0	0	0		A2	0.87	20	0	0	0	0		0.87	20	0	0	0	0	0	0.005286	2.79418e-05
A1	0.87	25	0	0	0	0			0.87	25	0	0	0	0	0		A2	0.87	25	0	0	0	0		0.87	25	0	0	0	0	0	0.026156	0.000684136
A1	0.87	30	0	0	0	0			0.87	30	0	0	0	0	0		A2	0.87	30	0	0	0	0		0.87	30	0	0	0	0	0	0.047026	0.00221144
A1	0.87	35	0	0	0	0			0.87	35	0	0	0	0	0		A2	0.87	35	0	0	0	0		0.87	35	0	0	0	0	0	0.067896	0.00460987
A1	0.87	40	0.00212238	0	0	0.000707459			0.87	40	0.01	0	0	0.00333333	0.057735		A2	0.87	40	0.0021208	0	0	0.000706934		0.87	40	0.01	0	0	0.00333333	0.057735	0.088766	0.0078794
A1	0.87	45	0.00212238	0.002119	0	0.00141379			0.87	45	0.01	0.01	0	0.00666667	0.0816497		A2	0.87	45	0.0042416	0.00212368	0	0.00212176		0.87	45	0.02	0.01	0	0.01	0.1	0.109636	0.0120201
A1	0.87	50	0.00212238	0.002119	0	0.00141379			0.87	50	0.01	0.01	0	0.00666667	0.0816497		A2	0.87	50	0.0063624	0.00424737	0	0.00353659		0.87	50	0.03	0.02	0	0.0166667	0.129099	0.130506	0.0170318
A1	1.63	0	0	0	0	0			1.63	0	0	0	0	0	0		A2	1.63	0	0	0	0	0		1.63	0	0	0	0	0	0	0.107094	0.0114691
A1	1.63	5	0.00212242	0.00211905	0.00212184	0.0021211			1.63	5	0.01	0.01	0.01	0.01	0.1		A2	1.63	5	0.00212094	0.00212377	0.00212085	0.00212185		1.63	5	0.01	0.01	0.01	0.01	0.1	0.127964	0.0163748
A1	1.63	10	0.00424484	0.0042381	0.00424367	0.0042422			1.63	10	0.02	0.02	0.02	0.02	0.141421		A2	1.63	10	0.00424187	0.00424755	0.00424169	0.0042437		1.63	10	0.02	0.02	0.02	0.02	0.141421	0.148834	0.0221516
A1	1.63	15	0.00636726	0.00635714	0.00636551	0.00636331			1.63	15	0.03	0.03	0.03	0.03	0.173205		A2	1.63	15	0.00636281	0.00637132	0.00636254	0.00636556		1.63	15	0.03	0.03	0.03	0.03	0.173205	0.169704	0.0287994
A1	1.63	20	0.00848969	0.00847619	0.00848734	0.00848441			1.63	20	0.04	0.04	0.04	0.04	0.2		A2	1.63	20	0.00848374	0.00849509	0.00848338	0.00848741		1.63	20	0.04	0.04	0.04	0.04	0.2	0.190574	0.0363184
A1	1.63	25	0.0106121	0.0105952	0.0106092	0.0106055			1.63	25	0.05	0.05	0.05	0.05	0.223607		A2	1.63	25	0.0106047	0.0106189	0.0106042	0.0106093		1.63	25	0.05	0.05	0.05	0.05	0.223607	0.211444	0.0447086
A1	1.63	30	0.0127345	0.0127143	0.012731	0.0127266			1.63	30	0.06	0.06	0.06	0.06	0.244949		A2	1.63	30	0.0127256	0.0127426	0.0127251	0.0127311		1.63	30	0.06	0.06	0.06	0.06	0.244949	0.232314	0.0539698
A1	1.63	35	0.0169794	0.0169524	0.0169747	0.0169688			1.63	35	0.08	0.08	0.08	0.08	0.282843		A2	1.63	35	0.0148466	0.0148664	0.0148459	0.014853		1.63	35	0.07	0.07	0.07	0.07	0.264575	0.253184	0.0641021
A1	1.63	40	0.0191018	0.0190714	0.0212184	0.0197972			1.63	40	0.09	0.09	0.1	0.0933333	0.305505		A2	1.63	40	0.0190884	0.019114	0.0169668	0.0183897		1.63	40	0.09	0.09	0.08	0.0866667	0.294392	0.274054	0.0751056
A1	1.63	45	0.0233466	0.0211905	0.0233402	0.0226258			1.63	45	0.11	0.1	0.11	0.106667	0.326599		A2	1.63	45	0.0233303	0.0233615	0.0212085	0.0226334		1.63	45	0.11	0.11	0.1	0.106667	0.326599	0.294924	0.0869802
A1	1.63	50	0.0275915	0.0254286	0.0275839	0.026868			1.63	50	0.13	0.12	0.13	0.126667	0.355903		A2	1.63	50	0.0275722	0.0276091	0.0254501	0.0268771		1.63	50	0.13	0.13	0.12	0.126667	0.355903	0.315794	0.0997259
																									2	65						0.46861	0.219595								0.96286

## Sheet: B (hız+)
			Ağırlık kaybı							Ağırlık (g)									Ağırlık kaybı							Ağırlık (g)
	Hız	Mesafe	1. Tek	2. Tek	3. Tek	Ort		Hız	Mesafe	1. Tek	2. Tek	3. Tek	Ort	Karekok			Hız	Mesafe	1. Tek	2. Tek	3. Tek	Ort		Hız	Mesafe	1. Tek	2. Tek	3. Tek	Ort	Karekok
B1	0.87	0	0	0	0	0		0.87	0	0	0	0	0	0		B2	0.87	0	0	0	0	0		0.87	0	0	0	0	0	0
B1	0.87	5	0	0	0	0		0.87	5	0	0	0	0	0		B2	0.87	5	0	0	0	0		0.87	5	0	0	0	0	0
B1	0.87	10	0	0	0	0		0.87	10	0	0	0	0	0		B2	0.87	10	0	0	0	0		0.87	10	0	0	0	0	0
B1	0.87	15	0	0	0	0		0.87	15	0	0	0	0	0		B2	0.87	15	0	0	0	0		0.87	15	0	0	0	0	0
B1	0.87	20	0	0	0	0		0.87	20	0	0	0	0	0		B2	0.87	20	0	0	0	0		0.87	20	0	0	0	0	0
B1	0.87	25	0	0	0	0		0.87	25	0	0	0	0	0		B2	0.87	25	0	0	0	0		0.87	25	0	0	0	0	0
B1	0.87	30	0	0	0.00213365	0.000711217		0.87	30	0	0	0.01	0.00333333	0.057735		B2	0.87	30	0	0	0	0		0.87	30	0	0	0	0	0
B1	0.87	35	0	0	0.00213365	0.000711217		0.87	35	0	0	0.01	0.00333333	0.057735		B2	0.87	35	0	0	0	0		0.87	35	0	0	0	0	0
B1	0.87	40	0	0	0.00213365	0.000711217		0.87	40	0	0	0.01	0.00333333	0.057735		B2	0.87	40	0	0	0	0		0.87	40	0	0	0	0	0
B1	0.87	45	0	0	0.00213365	0.000711217		0.87	45	0	0	0.01	0.00333333	0.057735		B2	0.87	45	0	0.00212301	0	0.000707669		0.87	45	0	0.01	0	0.00333333	0.057735
B1	0.87	50	0	0.00211981	0.00213365	0.00141782		0.87	50	0	0.01	0.01	0.00666667	0.0816497		B2	0.87	50	0	0.00424601	0	0.00141534		0.87	50	0	0.02	0	0.00666667	0.0816497
B1	1.63	0	0	0	0	0		1.63	0	0	0	0	0	0		B2	1.63	0	0	0	0	0		1.63	0	0	0	0	0	0
B1	1.63	5	0.00212008	0.00211986	0.0021337	0.00212455		1.63	5	0.01	0.01	0.01	0.01	0.1		B2	1.63	5	0.00212377	0.0021231	0.0021204	0.00212242		1.63	5	0.01	0.01	0.01	0.01	0.1
B1	1.63	10	0.00424016	0.00423971	0.00640109	0.00496032		1.63	10	0.02	0.02	0.03	0.0233333	0.152753		B2	1.63	10	0.00424755	0.00424619	0.00424079	0.00424484		1.63	10	0.02	0.02	0.02	0.02	0.141421
B1	1.63	15	0.00636024	0.00635957	0.0106685	0.0077961		1.63	15	0.03	0.03	0.05	0.0366667	0.191485		B2	1.63	15	0.00637132	0.00636929	0.00848158	0.00707407		1.63	15	0.03	0.03	0.04	0.0333333	0.182574
B1	1.63	20	0.00848033	0.00847943	0.0149359	0.0106319		1.63	20	0.04	0.04	0.07	0.05	0.223607		B2	1.63	20	0.00849509	0.0106155	0.0127224	0.010611		1.63	20	0.04	0.05	0.06	0.05	0.223607
B1	1.63	25	0.0127205	0.0105993	0.021337	0.0148856		1.63	25	0.06	0.05	0.1	0.07	0.264575		B2	1.63	25	0.0106189	0.0148617	0.0169632	0.0141479		1.63	25	0.05	0.07	0.08	0.0666667	0.258199
B1	1.63	30	0.0169607	0.014839	0.0256044	0.0191347		1.63	30	0.08	0.07	0.12	0.09	0.3		B2	1.63	30	0.0148664	0.0191079	0.021204	0.0183928		1.63	30	0.07	0.09	0.1	0.0866667	0.294392
B1	1.63	35	0.0212008	0.0190787	0.0298718	0.0233838		1.63	35	0.1	0.09	0.14	0.11	0.331662		B2	1.63	35	0.019114	0.0233541	0.0254448	0.0226376		1.63	35	0.09	0.11	0.12	0.106667	0.326599
B1	1.63	40	0.025441	0.0233184	0.0362729	0.0283441		1.63	40	0.12	0.11	0.17	0.133333	0.365148		B2	1.63	40	0.0233615	0.0276003	0.0296855	0.0268824		1.63	40	0.11	0.13	0.14	0.126667	0.355903
B1	1.63	45	0.0318012	0.0275581	0.0405403	0.0332999		1.63	45	0.15	0.13	0.19	0.156667	0.395811		B2	1.63	45	0.0297328	0.0339696	0.0360467	0.0332497		1.63	45	0.14	0.16	0.17	0.156667	0.395811
B1	1.63	50	0.0381615	0.0339177	0.0469413	0.0396735		1.63	50	0.18	0.16	0.22	0.186667	0.432049		B2	1.63	50	0.0361041	0.0403388	0.0424079	0.039617		1.63	50	0.17	0.19	0.2	0.186667	0.432049

## Sheet: C (hız+)
			Ağırlık kaybı							Ağırlık (g)									Ağırlık kaybı							Ağırlık (g)
	Hız	Mesafe	1. Tek	2. Tek	3. Tek	Ort	Kare	Hız	Mesafe	1. Tek	2. Tek	3. Tek	Ort	Karekok			Hız	Mesafe	1. Tek	2. Tek	3. Tek	Ort		Hız	Mesafe	1. Tek	2. Tek	3. Tek	Ort	Karekok
C1	0.87	0	0	0	0	0		0.87	0	0	0	0	0	0		C2	0.87	0	0	0	0	0		0.87	0	0	0	0	0	0
C1	0.87	5	0	0	0	0		0.87	5	0	0	0	0	0		C2	0.87	5	0	0	0	0		0.87	5	0	0	0	0	0
C1	0.87	10	0	0	0	0		0.87	10	0	0	0	0	0		C2	0.87	10	0	0	0	0		0.87	10	0	0	0	0	0
C1	0.87	15	0	0	0	0		0.87	15	0	0	0	0	0		C2	0.87	15	0	0	0	0		0.87	15	0	0	0	0	0
C1	0.87	20	0	0.00380048	0	0.00126683		0.87	20	0	0.02	0	0.00666667	0.0816497		C2	0.87	20	0	0.00394019	0	0.0013134		0.87	20	0	0.02	0	0.00666667	0.0816497
C1	0.87	25	0	0.00380048	0	0.00126683		0.87	25	0	0.02	0	0.00666667	0.0816497		C2	0.87	25	0	0.00788038	0	0.00262679		0.87	25	0	0.04	0	0.0133333	0.11547
C1	0.87	30	0	0.00570071	0	0.00190024		0.87	30	0	0.03	0	0.01	0.1		C2	0.87	30	0	0.0118206	0	0.00394019		0.87	30	0	0.06	0	0.02	0.141421
C1	0.87	35	0	0.00950119	0	0.00316706		0.87	35	0	0.05	0	0.0166667	0.129099		C2	0.87	35	0	0.0157608	0	0.00525358		0.87	35	0	0.08	0	0.0266667	0.163299
C1	0.87	40	0	0.0114014	0	0.00380048		0.87	40	0	0.06	0	0.02	0.141421		C2	0.87	40	0	0.0197009	0	0.00656698		0.87	40	0	0.1	0	0.0333333	0.182574
C1	0.87	45	0	0.0133017	0.00195817	0.00508661		0.87	45	0	0.07	0.01	0.0266667	0.163299		C2	0.87	45	0	0.0236411	0.0019442	0.00852844		0.87	45	0	0.12	0.01	0.0433333	0.208167
C1	0.87	50	0	0.0171021	0.00391635	0.00700616		0.87	50	0	0.09	0.02	0.0366667	0.191485		C2	0.87	50	0.00194894	0.0275813	0.0038884	0.0111396		0.87	50	0.01	0.14	0.02	0.0566667	0.238048
C1	1.63	0	0	0	0	0		1.63	0	0	0	0	0	0		C2	1.63	0	0	0	0	0		1.63	0	0	0	0	0	0
C1	1.63	5	0.0019202	0.00190056	0.00195825	0.00192634		1.63	5	0.01	0.01	0.01	0.01	0.1		C2	1.63	5	0.00389788	0.00197064	0.00194428	0.00260426		1.63	5	0.02	0.01	0.01	0.0133333	0.11547
C1	1.63	10	0.00576059	0.00380113	0.0039165	0.00449274		1.63	10	0.03	0.02	0.02	0.0233333	0.152753		C2	1.63	10	0.00974469	0.00591191	0.00388855	0.00651505		1.63	10	0.05	0.03	0.02	0.0333333	0.182574
C1	1.63	15	0.00960098	0.00570169	0.007833	0.00771189		1.63	15	0.05	0.03	0.04	0.04	0.2		C2	1.63	15	0.0136426	0.00985319	0.00777711	0.0104243		1.63	15	0.07	0.05	0.04	0.0533333	0.23094
C1	1.63	20	0.0115212	0.00760225	0.0117495	0.010291		1.63	20	0.06	0.04	0.06	0.0533333	0.23094		C2	1.63	20	0.0194894	0.0137945	0.0116657	0.0149832		1.63	20	0.1	0.07	0.06	0.0766667	0.276887
C1	1.63	25	0.0134414	0.0114034	0.015666	0.0135036		1.63	25	0.07	0.06	0.08	0.07	0.264575		C2	1.63	25	0.0253362	0.0197064	0.0155542	0.0201989		1.63	25	0.13	0.1	0.08	0.103333	0.321455
C1	1.63	30	0.0172818	0.0152045	0.0195825	0.0173563		1.63	30	0.09	0.08	0.1	0.09	0.3		C2	1.63	30	0.031183	0.0256183	0.0194428	0.0254147		1.63	30	0.16	0.13	0.1	0.13	0.360555
C1	1.63	35	0.0211222	0.0209062	0.023499	0.0218425		1.63	35	0.11	0.11	0.12	0.113333	0.33665		C2	1.63	35	0.0370298	0.0315302	0.0252756	0.0312785		1.63	35	0.19	0.16	0.13	0.16	0.4
C1	1.63	40	0.0249626	0.0266079	0.0293738	0.0269814		1.63	40	0.13	0.14	0.15	0.14	0.374166		C2	1.63	40	0.0428766	0.0394128	0.0311084	0.0377993		1.63	40	0.22	0.2	0.16	0.193333	0.439697
C1	1.63	45	0.0307231	0.0342101	0.0352485	0.0333939		1.63	45	0.16	0.18	0.18	0.173333	0.416333		C2	1.63	45	0.0506724	0.0453247	0.0388855	0.0449609		1.63	45	0.26	0.23	0.2	0.23	0.479583
C1	1.63	50	0.0364837	0.0418124	0.0430815	0.0404592		1.63	50	0.19	0.22	0.22	0.21	0.458258		C2	1.63	50	0.0565192	0.0532072	0.0466626	0.0521297		1.63	50	0.29	0.27	0.24	0.266667	0.516398

## Sheet: D (hız+)
			Ağırlık kaybı (%)							Ağırlık (g)									Ağırlık kaybı (%)							Ağırlık (g)
	Hız	Mesafe	1. Tek	2. Tek	3. Tek	Ort		Hız	Mesafe	1. Tek	2. Tek	3. Tek	Ort	Karekok			Hız	Mesafe	1. Tek	2. Tek	3. Tek	Ort		Hız	Mesafe	1. Tek	2. Tek	3. Tek	Ort
D1	0.87	0	0	0	0	0		0.87	0	0	0	0	0	0		D2	0.87	0	0	0	0	0		0.87	0	0	0	0	0
D1	0.87	5	0	0	0	0		0.87	5	0	0	0	0	0		D2	0.87	5	0	0	0	0		0.87	5	0	0	0	0
D1	0.87	10	0	0	0	0		0.87	10	0	0	0	0	0		D2	0.87	10	0	0	0	0		0.87	10	0	0	0	0
D1	0.87	15	0	0	0	0		0.87	15	0	0	0	0	0		D2	0.87	15	0	0	0	0		0.87	15	0	0	0	0
D1	0.87	20	0	0	0	0		0.87	20	0	0	0	0	0		D2	0.87	20	0	0	0	0		0.87	20	0	0	0	0
D1	0.87	25	0	0	0	0		0.87	25	0	0	0	0	0		D2	0.87	25	0	0	0	0		0.87	25	0	0	0	0
D1	0.87	30	0	0	0	0		0.87	30	0	0	0	0	0		D2	0.87	30	0	0	0	0		0.87	30	0	0	0	0
D1	0.87	35	0	0	0	0		0.87	35	0	0	0	0	0		D2	0.87	35	0	0	0	0		0.87	35	0	0	0	0
D1	0.87	40	0	0	0	0		0.87	40	0	0	0	0	0		D2	0.87	40	0	0	0	0		0.87	40	0	0	0	0
D1	0.87	45	0	0	0	0		0.87	45	0	0	0	0	0		D2	0.87	45	0	0	0	0		0.87	45	0	0	0	0
D1	0.87	50	0	0	0	0		0.87	50	0	0	0	0	0		D2	0.87	50	0	0	0	0		0.87	50	0	0	0	0
D1	1.63	0	0	0	0	0		1.63	0	0	0	0	0	0		D2	1.63	0	0	0	0	0		1.63	0	0	0	0	0
D1	1.63	5	0	0	0	0		1.63	5	0	0	0	0	0		D2	1.63	5	0	0	0	0		1.63	5	0	0	0	0
D1	1.63	10	0.00207413	0.00206641	0.00210588	0.00208214		1.63	10	0.01	0.01	0.01	0.01	0.1		D2	1.63	10	0.00417955	0.00412448	0.00423451	0.00417951		1.63	10	0.02	0.02	0.02	0.06
D1	1.63	15	0.00622239	0.00413283	0.00421177	0.00485566		1.63	15	0.03	0.02	0.02	0.0233333	0.152753		D2	1.63	15	0.00835911	0.00824895	0.00846901	0.00835902		1.63	15	0.04	0.04	0.04	0.12
D1	1.63	20	0.00829652	0.00826566	0.00631765	0.00762661		1.63	20	0.04	0.04	0.03	0.0366667	0.191485		D2	1.63	20	0.0125387	0.0123734	0.0127035	0.0125385		1.63	20	0.06	0.06	0.06	0.18
D1	1.63	25	0.0103706	0.0123985	0.0105294	0.0110995		1.63	25	0.05	0.06	0.05	0.0533333	0.23094		D2	1.63	25	0.0167182	0.0164979	0.0148208	0.0160123		1.63	25	0.08	0.07	0.0766667	0.226667
D1	1.63	30	0.0124448	0.0165313	0.0147412	0.0145724		1.63	30	0.06	0.08	0.07	0.07	0.264575		D2	1.63	30	0.0229875	0.0206224	0.0190553	0.0208884		1.63	30	0.1	0.09	0.1	0.29
D1	1.63	35	0.016593	0.0206641	0.018953	0.0187367		1.63	35	0.08	0.1	0.09	0.09	0.3		D2	1.63	35	0.0292569	0.0247469	0.025407	0.0264703		1.63	35	0.12	0.12	0.126667	0.366667
D1	1.63	40	0.0186672	0.024797	0.0210588	0.0215077		1.63	40	0.09	0.12	0.1	0.103333	0.321455		D2	1.63	40	0.0355262	0.0288713	0.0317588	0.0320521		1.63	40	0.14	0.15	0.153333	0.443333
D1	1.63	45	0.0228154	0.0289298	0.0252706	0.0256719		1.63	45	0.11	0.14	0.12	0.123333	0.351188		D2	1.63	45	0.0417955	0.0329958	0.0381106	0.037634		1.63	45	0.16	0.18	0.18	0.52
D1	1.63	50	0.0269637	0.035129	0.0294824	0.030525		1.63	50	0.13	0.17	0.14	0.146667	0.382971		D2	1.63	50	0.0501546	0.0391825	0.0465796	0.0453056		1.63	50	0.19	0.22	0.216667	0.626667
